# Supplementary material for: Mycosis fungoides and Sézary syndrome: a population-wide study on prevalence and health care use in Finland in 1998–2016
Source: PubMed Central journal article supplement (PMC7898452; doi:10.1186/s12913-021-06109-9), 2021-02-22
Supplement: 12913_2021_6109_MOESM1_ESM.pdf [file 12913_2021_6109_MOESM1_ESM.pdf]

Additional file 1. Detailed prevalence of diagnosed MF/SS.

Supplementary Table 1. Number of diagnosed mycosis fungoides (MF) and Sézary syndrome (SS) patients using health care services during each calendar year, and the corresponding prevalence (1/100 000) in Finland in 1998-2016.

|                                    | Year    |         |         |         |         |         |         |         |         |         |         |         |         |         |         |         |         |         |         |
|------------------------------------|---------|---------|---------|---------|---------|---------|---------|---------|---------|---------|---------|---------|---------|---------|---------|---------|---------|---------|---------|
|                                    | 1998    | 1999    | 2000    | 2001    | 2002    | 2003    | 2004    | 2005    | 2006    | 2007    | 2008    | 2009    | 2010    | 2011    | 2012    | 2013    | 2014    | 2015    | 2016    |
| Population<br>Dec 31 <sup>st</sup> | 5159646 | 5171302 | 5181115 | 5194901 | 5206295 | 5219732 | 5236611 | 5255580 | 5276955 | 5300484 | 5326314 | 5351427 | 5375176 | 5401267 | 5426674 | 5451270 | 5471753 | 5487308 | 5503297 |
| n SS<br>patients                   | 8       | 7       | 9       | 10      | 13      | 16      | 11      | 12      | 10      | 13      | 11      | 8       | 15      | 18      | 22      | 20      | 26      | 15      | 20      |
| n MF<br>patients                   | 105     | 95      | 103     | 105     | 123     | 108     | 116     | 116     | 133     | 151     | 181     | 191     | 216     | 231     | 252     | 270     | 297     | 284     | 296     |
| SS<br>1/100 000                    | 0.16    | 0.14    | 0.17    | 0.19    | 0.25    | 0.31    | 0.21    | 0.23    | 0.19    | 0.25    | 0.21    | 0.15    | 0.28    | 0.33    | 0.41    | 0.37    | 0.48    | 0.27    | 0.36    |
| MF<br>1/100 000                    | 2.04    | 1.84    | 1.99    | 2.02    | 2.36    | 2.07    | 2.22    | 2.21    | 2.52    | 2.85    | 3.40    | 3.57    | 4.02    | 4.28    | 4.64    | 4.95    | 5.43    | 5.18    | 5.38    |

Supplementary Table 2a). Number of diagnosed mycosis fungoides (MF) patients using health care services during each calendar year, and the corresponding prevalence (1/100 000) among men by age group in Finland in 1998-2016.

|                  | Year   |        |        |        |        |        |        |        |        |        |        |        |        |        |        |        |        |        |        |
|------------------|--------|--------|--------|--------|--------|--------|--------|--------|--------|--------|--------|--------|--------|--------|--------|--------|--------|--------|--------|
|                  | 1998   | 1999   | 2000   | 2001   | 2002   | 2003   | 2004   | 2005   | 2006   | 2007   | 2008   | 2009   | 2010   | 2011   | 2012   | 2013   | 2014   | 2015   | 2016   |
| <b>Age 40-49</b> |        |        |        |        |        |        |        |        |        |        |        |        |        |        |        |        |        |        |        |
| Popul.           | 407592 | 400855 | 395721 | 392833 | 389193 | 387763 | 385853 | 383001 | 380065 | 378447 | 377671 | 373253 | 368162 | 362194 | 355356 | 347351 | 342288 | 340102 | 338810 |
| n MF             | 3      | 3      | 5      | 5      | 6      | 3      | 3      | 6      | 5      | 5      | 9      | 3      | 6      | 9      | 6      | 10     | 12     | 10     | 10     |
| 1/100000         | 0.61   | 0.62   | 1.26   | 1.27   | 1.54   | 0.64   | 0.65   | 1.57   | 1.32   | 1.32   | 2.38   | 0.67   | 1.63   | 2.48   | 1.69   | 2.88   | 3.51   | 2.94   | 2.95   |
| <b>Age 50-59</b> |        |        |        |        |        |        |        |        |        |        |        |        |        |        |        |        |        |        |        |
| Popul.           | 340707 | 354432 | 370007 | 374532 | 390373 | 398561 | 405168 | 404641 | 400700 | 394668 | 386983 | 381713 | 377765 | 375750 | 373341 | 372917 | 372309 | 370591 | 368581 |
| n MF             | 12     | 12     | 16     | 17     | 17     | 20     | 16     | 15     | 18     | 12     | 20     | 24     | 23     | 24     | 21     | 30     | 27     | 23     | 22     |
| 1/100000         | 3.52   | 3.39   | 4.32   | 4.54   | 4.35   | 5.02   | 3.95   | 3.71   | 4.49   | 3.04   | 5.17   | 6.29   | 6.09   | 6.39   | 5.62   | 8.04   | 7.25   | 6.21   | 5.97   |
| <b>Age 60-69</b> |        |        |        |        |        |        |        |        |        |        |        |        |        |        |        |        |        |        |        |
| Popul.           | 224567 | 227778 | 226895 | 235819 | 235026 | 240655 | 246587 | 258721 | 274834 | 290648 | 304745 | 317435 | 331591 | 335965 | 350189 | 357877 | 364408 | 364669 | 361856 |
| n MF             | 14     | 8      | 15     | 18     | 21     | 16     | 18     | 20     | 23     | 32     | 33     | 35     | 34     | 38     | 36     | 43     | 55     | 60     | 59     |
| 1/100000         | 6.23   | 3.51   | 6.61   | 7.63   | 8.94   | 6.65   | 7.30   | 7.73   | 8.37   | 11.01  | 10.83  | 11.03  | 10.25  | 11.31  | 10.28  | 12.02  | 15.09  | 16.45  | 16.30  |
| <b>Age 70-79</b> |        |        |        |        |        |        |        |        |        |        |        |        |        |        |        |        |        |        |        |
| Popul.           | 136730 | 142741 | 147108 | 151283 | 154538 | 156356 | 158858 | 161895 | 164251 | 167432 | 171389 | 175443 | 175962 | 184527 | 184707 | 189963 | 195270 | 206094 | 220036 |
| n MF             | 15     | 14     | 13     | 15     | 18     | 10     | 16     | 17     | 25     | 26     | 28     | 36     | 36     | 41     | 51     | 44     | 47     | 46     | 51     |
| 1/100000         | 10.97  | 9.81   | 8.84   | 9.92   | 11.65  | 6.40   | 10.07  | 10.50  | 15.22  | 15.53  | 16.34  | 20.52  | 20.46  | 22.22  | 27.61  | 23.16  | 24.07  | 22.32  | 23.18  |
| <b>Age 80-89</b> |        |        |        |        |        |        |        |        |        |        |        |        |        |        |        |        |        |        |        |
| Popul.           | 42287  | 41818  | 43554  | 45196  | 46818  | 49359  | 52384  | 55900  | 59313  | 62694  | 66831  | 70587  | 73871  | 77226  | 79683  | 81672  | 83834  | 86563  | 88708  |
| n MF             | 11     | 10     | 9      | 6      | 8      | 10     | 6      | 6      | 3      | 6      | 8      | 14     | 18     | 22     | 24     | 23     | 29     | 28     | 26     |
| 1/100000         | 26.01  | 23.91  | 20.66  | 13.28  | 17.09  | 20.26  | 11.45  | 10.73  | 4.21   | 9.57   | 11.97  | 19.83  | 24.37  | 28.49  | 30.12  | 28.16  | 34.59  | 32.35  | 29.31  |

Supplementary Table 2b). Number of diagnosed mycosis fungoides (MF) patients using health care services during each calendar year, and the corresponding prevalence (1/100 000) among women by age group in Finland in 1998-2016.

|                  | Year   |        |        |        |        |        |        |        |        |        |        |        |        |        |        |        |        |        |        |
|------------------|--------|--------|--------|--------|--------|--------|--------|--------|--------|--------|--------|--------|--------|--------|--------|--------|--------|--------|--------|
|                  | 1998   | 1999   | 2000   | 2001   | 2002   | 2003   | 2004   | 2005   | 2006   | 2007   | 2008   | 2009   | 2010   | 2011   | 2012   | 2013   | 2014   | 2015   | 2016   |
| <b>Age 40-49</b> |        |        |        |        |        |        |        |        |        |        |        |        |        |        |        |        |        |        |        |
| Popul.           | 395441 | 390076 | 385971 | 383815 | 380451 | 379001 | 376337 | 373876 | 371257 | 369516 | 368433 | 363842 | 358598 | 352557 | 345412 | 336755 | 331708 | 328146 | 325754 |
| n MF             | 3      | 3      | 3      | 8      | 5      | 8      | 10     | 6      | 3      | 3      | 3      | 7      | 9      | 7      | 7      | 9      | 9      | 9      | 10     |
| 1/100000         | 0.63   | 0.64   | 0.65   | 2.08   | 1.31   | 2.11   | 2.66   | 1.60   | 0.67   | 0.68   | 0.68   | 1.92   | 2.51   | 1.99   | 2.03   | 2.67   | 2.71   | 2.74   | 3.07   |
| <b>Age 50-59</b> |        |        |        |        |        |        |        |        |        |        |        |        |        |        |        |        |        |        |        |
| Popul.           | 341511 | 353328 | 368223 | 372072 | 387710 | 396594 | 404652 | 405220 | 401659 | 396261 | 389204 | 384489 | 381200 | 379672 | 377025 | 376254 | 374173 | 372020 | 369578 |
| n MF             | 9      | 6      | 7      | 5      | 7      | 7      | 8      | 5      | 12     | 17     | 15     | 13     | 17     | 17     | 18     | 21     | 20     | 15     | 15     |
| 1/100000         | 2.64   | 1.70   | 1.90   | 1.34   | 1.81   | 1.77   | 1.98   | 1.23   | 2.99   | 4.29   | 3.85   | 3.38   | 4.46   | 4.48   | 4.77   | 5.58   | 5.35   | 4.03   | 4.06   |
| <b>Age 60-69</b> |        |        |        |        |        |        |        |        |        |        |        |        |        |        |        |        |        |        |        |
| Popul.           | 257149 | 258603 | 255545 | 263477 | 261169 | 265820 | 270711 | 281690 | 297295 | 312447 | 326283 | 337770 | 352118 | 355914 | 370927 | 379527 | 387436 | 388254 | 385074 |
| n MF             | 9      | 5      | 7      | 7      | 6      | 5      | 6      | 8      | 7      | 14     | 20     | 18     | 24     | 25     | 28     | 27     | 29     | 24     | 23     |
| 1/100000         | 3.50   | 1.93   | 2.74   | 2.66   | 2.30   | 1.88   | 2.22   | 2.84   | 2.35   | 4.48   | 6.13   | 5.33   | 6.82   | 7.02   | 7.55   | 7.11   | 7.49   | 6.18   | 5.97   |
| <b>Age 70-79</b> |        |        |        |        |        |        |        |        |        |        |        |        |        |        |        |        |        |        |        |
| Popul.           | 219904 | 226209 | 227440 | 227546 | 227415 | 224838 | 224575 | 224389 | 224364 | 225574 | 227054 | 229271 | 227170 | 235234 | 233171 | 237513 | 242027 | 252265 | 266621 |
| n MF             | 13     | 13     | 11     | 9      | 18     | 15     | 18     | 13     | 13     | 13     | 19     | 15     | 16     | 18     | 20     | 16     | 19     | 12     | 22     |
| 1/100000         | 5.91   | 5.75   | 4.84   | 3.96   | 7.92   | 6.67   | 8.02   | 5.79   | 5.79   | 5.76   | 8.37   | 6.54   | 7.04   | 7.65   | 8.58   | 6.74   | 7.85   | 4.76   | 8.25   |
| <b>Age 80-89</b> |        |        |        |        |        |        |        |        |        |        |        |        |        |        |        |        |        |        |        |
| Popul.           | 109269 | 107576 | 110935 | 114133 | 116616 | 120283 | 123903 | 128450 | 132614 | 136022 | 139967 | 145070 | 147738 | 149392 | 150579 | 150173 | 150657 | 151376 | 151974 |
| n MF             | 6      | 5      | 6      | 8      | 9      | 5      | 5      | 6      | 9      | 8      | 7      | 10     | 10     | 9      | 14     | 18     | 18     | 19     | 18     |
| 1/100000         | 5.49   | 4.65   | 5.41   | 7.01   | 7.72   | 4.16   | 4.04   | 4.67   | 6.79   | 5.88   | 5.00   | 6.89   | 6.77   | 6.02   | 9.30   | 11.99  | 11.95  | 12.55  | 11.84  |
