# Supplementary material for: Mycosis fungoides and Sézary syndrome: a population-wide study on prevalence and health care use in Finland in 1998–2016
Source: PubMed Central journal article supplement (PMC7898452; doi:10.1186/s12913-021-06109-9), 2021-02-22
Supplement: 12913_2021_6109_MOESM2_ESM.pdf [file 12913_2021_6109_MOESM2_ESM.pdf]

1 Additional file 2. Cumulative hazard of death and institutionalisation after Mycosis fungoides  
2 or Sézary syndrome diagnosis.

3

4 **Data:** The Opioid Patient Trends in Finland OPTI dataset includes full data on social and health  
5 care use, prescribed medications, and deaths for all inhabitants in Finland with reimbursed  
6 opioid medication in 2009-2017 (n = 1 761 584).

7 **Methods:** The OPTI dataset was investigated for patients who had secondary health care  
8 outpatient visits or inpatient stays where the primary or secondary diagnosis was ICD-10  
9 C84.0 (mycosis fungoides MF) or C84.1 (Sézary syndrome SS) for the first time in 2012-2014.  
10 The patients had a three-year wash-out period, during which they could not have MF/SS  
11 related health care use. These incident patients were followed up for three years after the  
12 initial MF/SS diagnosis to inspect the cumulative hazard of death and institutionalisation,  
13 which was defined as moving to a nursing home or a similar social care institution.

14 **Results:** 102 individuals with a MF or SS diagnosis were identified. The cumulative hazard for  
15 death or institutionalisation is presented in table 1.

16

17 Supplementary Table 3. Cumulative hazard of death and institutionalisation in a sample of  
18 102 incident MF/SS patients.

|                                     | Year 1     | Year 2     | Year 3     |
|-------------------------------------|------------|------------|------------|
| Death % (n)                         | 10.8% (11) | 14.7% (15) | 21.6% (22) |
| Institutionalisation % (n)          | 2.9% (3)   | 3.9% (4)   | 4.9% (5)   |
| Death or institutionalisation % (n) | 13.7% (14) | 18.6% (19) | 26.5% (27) |

19
